# Supplementary material for: Activated human CD4+ T cells express transporters for both cysteine and cystine
Source: PubMed Central journal article supplement — Sci Rep. 2012 Feb 14;2:266. doi: 10.1038/srep00266 (PMC3278673; doi:10.1038/srep00266), 2012-02-14
Supplement: srep00266-s1.pdf [file srep00266-s1.pdf]

## **Supplementary Information**

### **Activated human CD4<sup>+</sup> T cells express transporters for both cysteine and cystine**

Trine Bøegh Levring, Ann Kathrine Hansen, Bodil Lisbeth Nielsen, Martin Kongsbak, Marina

Rode von Essen, Anders Woetmann, Niels Ødum, Charlotte Menné Bonefeld & Carsten Geisler

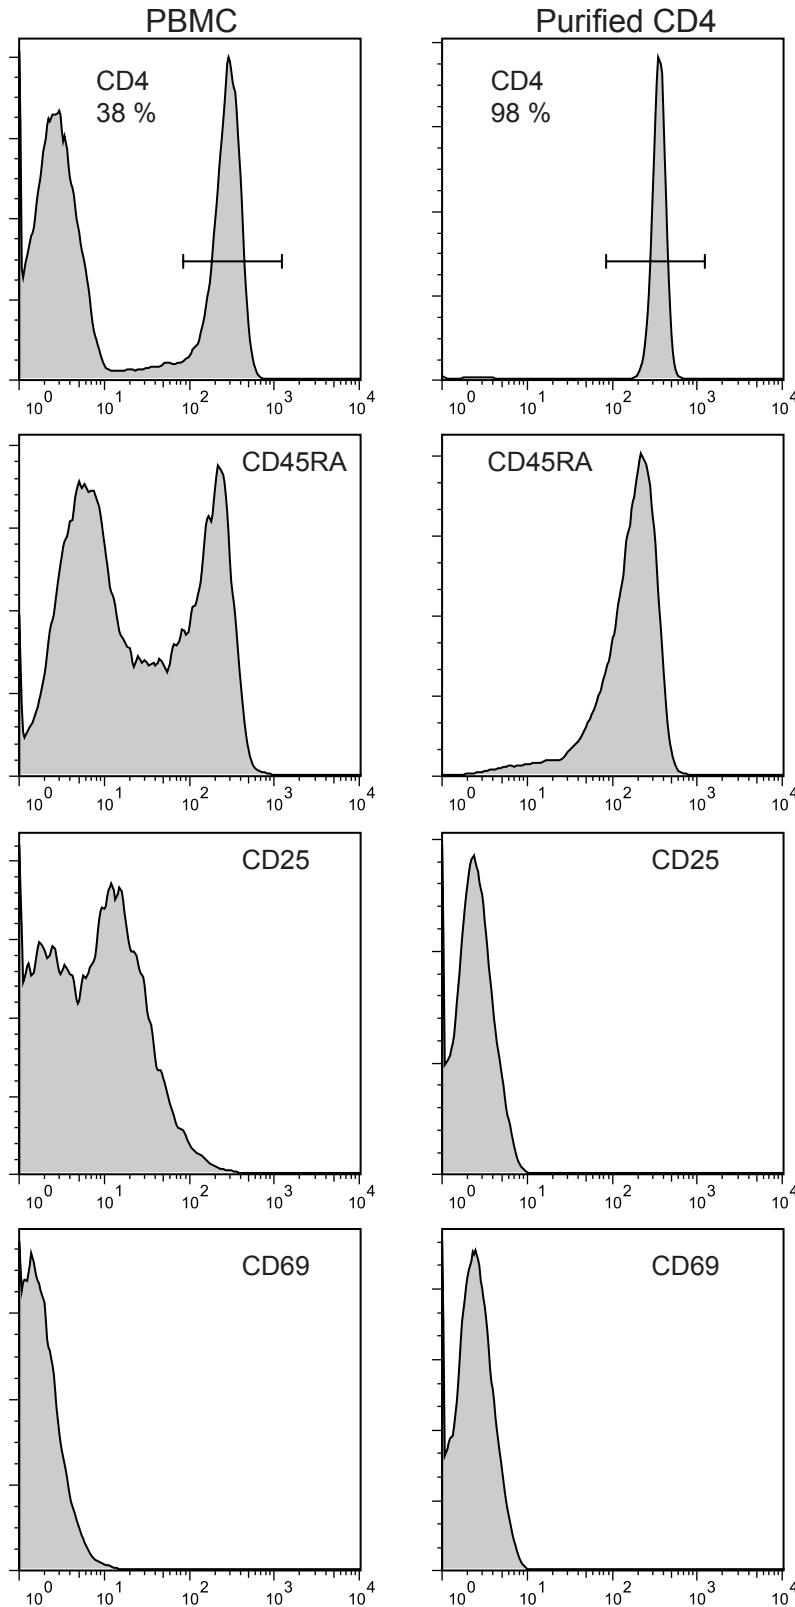

**Figure 1S.** Peripheral blood mononuclear cells (PBMC, first column) and purified naive CD4<sup>+</sup> T cells were stained with antibodies against CD4, CD45RA, CD25 or CD69 and analysed by flow cytometry. The percentage of CD4<sup>+</sup> T cells in the two cell populations are given in the FACS histograms in the first row. The CD4<sup>+</sup> cells were gated (as indicated with the bar in the first row) and the expression levels of CD45RA (second row), CD25 (third row) or CD69 (fourth row) on the gated cells are shown.

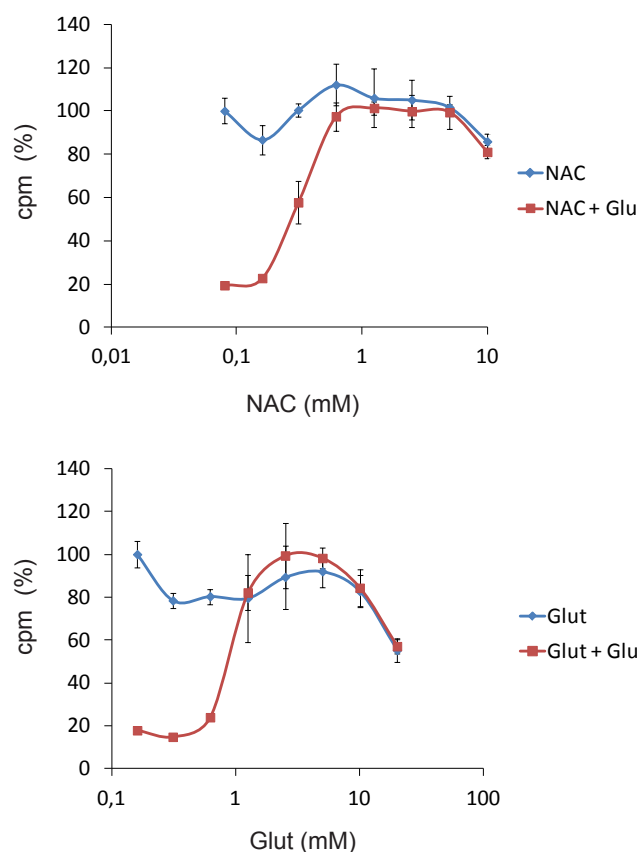

**Figure 2S.** Purified T cells were stimulated with Dynabeads Human T-Activator CD3/CD28 in the presence of the indicated concentrations of N-acetyl-L-cysteine (NAC) (A) or glutathione (Glut) (B) in X-VIVO 15 medium (blue curves) or X-VIVO15 medium supplemented with 20 mM glutamic acid (Glu) (red curves). The ordinate gives T cell proliferation in cpm relative to the T cell proliferation obtained in X-VIVO 15 medium with the lowest concentration of NAC (A) or Glut (B). The results represent mean values  $\pm$  SEM of triplicates determinations and are representative for three separate experiments.
